# Supplementary material for: Optimization of a simple, effective, and greener methodology for polycyclic aromatic hydrocarbon extraction from human adipose tissue
Source: Royal Society of Chemistry journal article supplement (doi:10.1039/d2ay02075k), 2023-01-01
Supplement: d2ay02075k1.pdf [file d2ay02075k1.pdf]

**Optimization of a Simple, Effective, and Greener methodology for Polycyclic  
Aromatic Hydrocarbons extraction from Human Adipose Tissue - Supplementary  
Material**

Sara Sousa<sup>a,b</sup>, Paula Paíga<sup>a</sup>, Diogo Pestana<sup>b,c</sup>, Gil Faria<sup>b,d</sup>, Cristina Delerue-Matos<sup>a</sup>, Maria João Ramalhosa<sup>a</sup>,  
Conceição Calhau<sup>b,c</sup>, Valentina Fernandes Domingues<sup>a,†</sup>

<sup>a</sup>REQUIMTE/LAQV-GRAQ, Instituto Superior de Engenharia do Porto, Politécnico do Porto, 4249-015 Porto, Portugal.

<sup>b</sup>Center for Research in Health Technologies and Information Systems, 4200-450 Porto, Portugal.

<sup>c</sup>Nutrição e Metabolismo NOVA Medical School Faculdade de Ciências Médicas Universidade Nova de Lisboa, 1169-  
056 Lisboa, Portugal;

<sup>d</sup>Faculty of Medicine, University of Porto, 4200-319 Porto, Portugal.

† Author to whom correspondence should be addressed:

Valentina Fernandes Domingues REQUIMTE/LAQV, Instituto Superior de Engenharia, Instituto  
Politécnico do Porto, Rua Dr António Bernardino de Almeida, 431, 4249-015 Porto Portugal

Tel. +351228340500

Email. vfd@isep.ipp.pt

Table SM1 – PAHs content of each standard solution (S) prepared ( $\mu\text{g/L}$ ).

| PAHs              | Concentration ( $\mu\text{g/L}$ ) |        |        |        |        |        |        |        |        |        |
|-------------------|-----------------------------------|--------|--------|--------|--------|--------|--------|--------|--------|--------|
|                   | S1                                | S2     | S3     | S4     | S5     | S6     | S7     | S8     | S9     | S10    |
| B[a]P (reference) | 0.13                              | 0.25   | 0.50   | 1.25   | 2.51   | 5.01   | 7.52   | 10.03  | 15.04  | 20.06  |
| Naph              | 1.30                              | 2.52   | 5.01   | 12.55  | 25.07  | 50.15  | 75.22  | 100.30 | 150.45 | 200.60 |
| Acy               | 73.88                             | 100.07 | 148.63 | 171.61 | 196.67 | 298.30 | 399.93 | 497.60 | 597.90 | 700.30 |
| Ace               | 1.30                              | 2.52   | 5.01   | 12.55  | 25.07  | 50.15  | 75.22  | 100.30 | 150.45 | 200.60 |
| Flu               | 0.26                              | 0.50   | 0.99   | 2.48   | 4.95   | 9.89   | 14.84  | 19.79  | 29.68  | 39.58  |
| Phe               | 0.13                              | 0.25   | 0.50   | 1.25   | 2.50   | 5.00   | 7.51   | 10.01  | 15.01  | 20.01  |
| Ant               | 0.13                              | 0.25   | 0.50   | 1.25   | 2.50   | 5.01   | 7.51   | 10.02  | 15.03  | 20.04  |
| Fln               | 0.26                              | 0.50   | 0.99   | 2.47   | 4.93   | 9.86   | 14.80  | 19.73  | 29.59  | 39.46  |
| Pyr               | 0.13                              | 0.24   | 0.48   | 1.21   | 2.42   | 4.84   | 7.27   | 9.69   | 14.53  | 19.38  |
| B[a]A             | 0.13                              | 0.25   | 0.49   | 1.23   | 2.46   | 4.92   | 7.38   | 9.84   | 14.76  | 19.68  |
| Chry              | 0.13                              | 0.25   | 0.50   | 1.24   | 2.48   | 4.95   | 7.43   | 9.91   | 14.86  | 19.82  |
| B[b]Ft + B[j]Ft   | 0.52                              | 1.00   | 2.00   | 5.01   | 10.02  | 20.04  | 30.06  | 40.08  | 60.12  | 80.16  |
| B[k]Ft            | 0.13                              | 0.25   | 0.50   | 1.25   | 2.49   | 4.99   | 7.48   | 9.98   | 14.97  | 19.96  |
| DB[a,l]P          | 0.26                              | 0.50   | 1.00   | 2.50   | 5.00   | 10.00  | 15.00  | 20.00  | 30.00  | 40.00  |
| DB[a,h]A          | 0.26                              | 0.50   | 1.00   | 2.50   | 5.00   | 10.00  | 15.00  | 20.00  | 30.00  | 40.00  |
| B[g,h,i]P         | 0.26                              | 0.50   | 0.99   | 2.49   | 4.97   | 9.95   | 14.92  | 19.90  | 29.85  | 39.80  |
| InP               | 0.13                              | 0.25   | 0.50   | 1.26   | 2.51   | 5.02   | 7.53   | 10.04  | 15.06  | 20.08  |

acenaphthene (Ace); acenaphthylene (Acy); anthracene (Ant); benz[a]anthracene (B[a]A); benzo[a]pyrene (B[a]P); benzo[b]fluoranthene (B[b]Ft); benzo[g,h,i]perylene (B[g,h,i]P); benzo[j]fluoranthene (B[j]Ft); benzo[k]fluoranthene (B[k]Ft); chrysene (Chry); dibenz[a,h]anthracene (DB[a,h]A); dibenzo[a,l]pyrene (DB[a,l]P); fluoranthene (Fln); fluorene (Flu); indeno[1,2,3-cd]pyrene (InP); naphthalene (Naph); phenanthrene (Phe); polycyclic aromatic hydrocarbon (PAH); pyrene (Pyr); S – standard

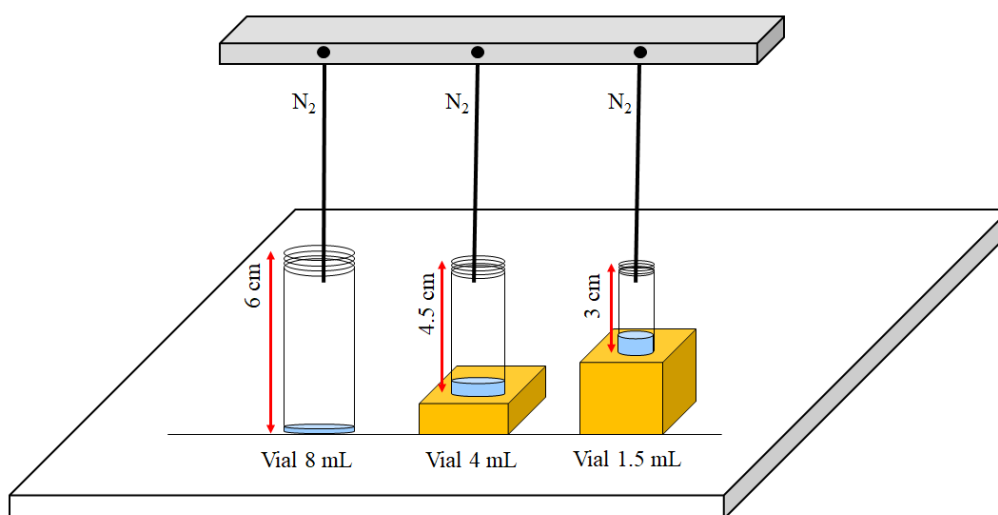

Figure SM1 – Diagram of nitrogen ( $\text{N}_2$ ) evaporation step of PAHs standard mixture S8 in different capacity glass vials (section 2.3.3).

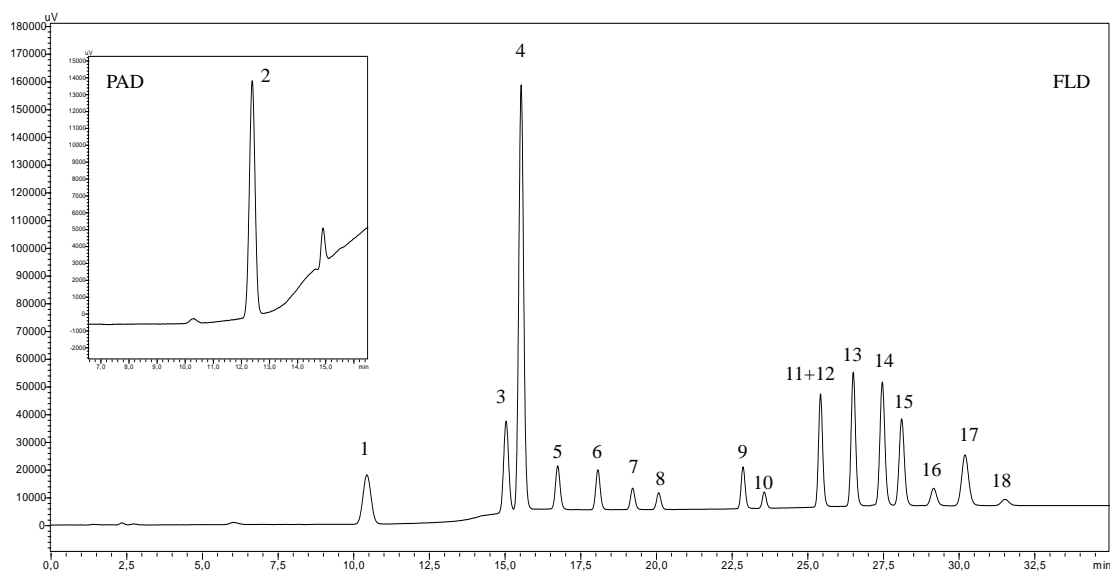

Figure SM2 – HPLC chromatogram for PAHs standard mixture S8 [1-naphthalene (Naph); 2-acenaphthylene (Acy); 3-acenaphthene (Ace); 4-fluorene (Flu); 5-phenanthrene (Phe); 6-anthracene (Ant); 7-fluoranthene (Fln); 8-pyrene (Pyr); 9-benz[a]anthracene (B[a]A); 10-chrysene (Chry); 11+12-benzo[b]fluoranthene (B[b]Ft + benzo[j]fluoranthene (B[j]Ft); 13-benzo[k]fluoranthene (B[k]Ft); 14-benzo[a]pyrene (B[a]P); 15-dibenzo[a,l]pyrene (DB[a,l]P); 16-dibenz[a,h]anthracene (DB[a,h]A); 17-benzo[g,h,i]perylene (B[g,h,i]P); and 18-indeno[1,2,3-cd]pyrene (InP)]; FLD – fluorescence detector; PDA- photodiode array detector.

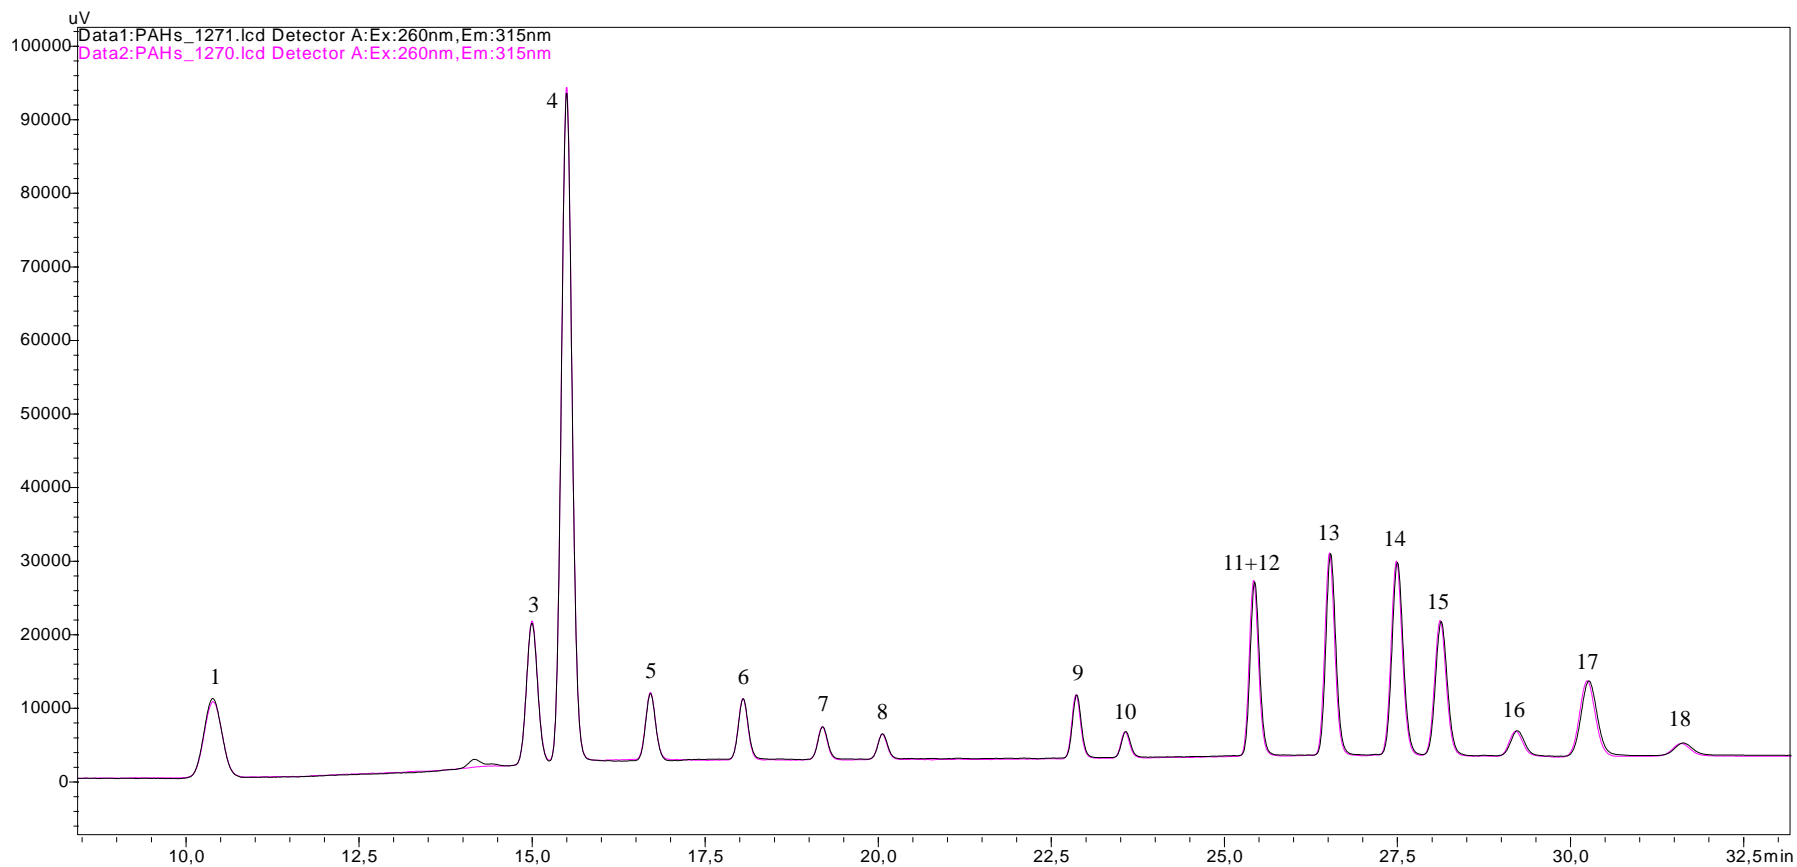

Figure SM3– Overlay of HPLC-FLD chromatograms of PAHs standard mixture S8 in two different conditions: S8 without being filtered (black) and S8 filtered (pink). Legend: 1-naphthalene (Naph); 3-acenaphthene (Ace); 4-fluorene (Flu); 5-phenanthrene (Phe); 6-anthracene (Ant); 7-fluoranthene (Fln); 8-pyrene (Pyr); 9-benz[a]anthracene (B[a]A); 10-chrysene (Chry); 11+12-benzo[b]fluoranthene (B[b]Ft) + benzo[j]fluoranthene (B[j]Ft); 13-benzo[k]fluoranthene (B[k]Ft); 14-benzo[a]pyrene (B[a]P); 15-dibenzo[a,l]pyrene (DB[a,l]P); 16-dibenz[a,h]anthracene (DB[a,h]A); 17-benzo[g,h,i]perylene (B[g,h,i]P); and 18-indeno[1,2,3-cd]pyrene (InP).

Table SM2– Redissolution of PAHs after evaporation in different solvents, expressed as loss of PAHs (%).

| PAHs            | PAHs loss (%)            |                                |                                |                                |             |                                   |
|-----------------|--------------------------|--------------------------------|--------------------------------|--------------------------------|-------------|-----------------------------------|
|                 | Solvent                  |                                |                                |                                |             |                                   |
|                 | 100%<br>Ultra-pure water | 75:25%<br>Ultra-pure water-ACN | 50:50%<br>Ultra-pure water-ACN | 25:75%<br>Ultra-pure water-ACN | 100%<br>ACN | 100%<br>ACN with 0.1% formic acid |
| Naph            | 100                      | 100                            | 100                            | 100                            | 100         | 100                               |
| Acy             | 100                      | 100                            | 100                            | 100                            | 97.6        | 100*                              |
| Ace             | 100                      | 100                            | 100                            | 100                            | 97.1        | 97.7                              |
| Flu             | 99.8                     | 99.2                           | 99.2                           | 98.4                           | 92.1        | 98.7**                            |
| Phe             | 98.5                     | 92.5                           | 92.7                           | 75.2                           | 55.2        | 92.4****                          |
| Ant             | 98.7                     | 92.6                           | 92.1                           | 75.4                           | 54.5        | 92.0****                          |
| Fln             | 90.5                     | 40.7                           | 33.5                           | 22.0                           | 9.1         | 29.3***                           |
| Pyr             | 89.7                     | 33.6                           | 23.7                           | 14.6                           | 6.5         | 22.6***                           |
| B[a]A           | 97.3                     | 15.5                           | 3.5                            | 3.0                            | 3.4         | 2.9                               |
| Chry            | 95.7                     | 16.0                           | 3.0                            | 2.0                            | -1.3        | 4.9**                             |
| B[b]Ft + B[j]Ft | 99.4                     | 15.2                           | 1.0                            | 2.0                            | 0.2         | 0.4                               |
| B[k]Ft          | 99.2                     | 16.5                           | 1.6                            | 2.2                            | 0.9         | 0.3                               |
| B[a]P           | 100                      | 15.7                           | 1.5                            | 1.4                            | 0.0         | 0.7                               |
| DB[a,l]P        | 100                      | 26.3                           | 2.3                            | 1.7                            | -0.7        | 0.7                               |
| DB[a,h]A        | 100                      | 19.4                           | 1.2                            | 0.6                            | -4.1        | -2.5*                             |
| B[g,h,i]P       | 100                      | 18.7                           | 1.0                            | 1.0                            | -1.4        | 2.2**                             |
| InP             | 100                      | 21.3                           | 2.5                            | 1.0                            | 2.0         | -3.9**                            |

Statistical significance was evaluated by Students t-test. Significant difference between 100% ACN with and without formic acid, \* $p < 0.05$ , \*\*  $p < 0.01$ , \*\*\*  $p < 0.001$ , \*\*\*\*  $p < 0.0001$ . Acenaphthene (Ace); acenaphthylene (Acy); acetonitrile (ACN); anthracene (Ant); benz[a]anthracene (B[a]A); benzo[a]pyrene (B[a]P); benzo[b]fluoranthene (B[b]Ft); benzo[g,h,i]perylene (B[g,h,i]P); benzo[j]fluoranthene (B[j]Ft); benzo[k]fluoranthene (B[k]Ft); chrysene (Chry); dibenz[a,h]anthracene (DB[a,h]A); dibenzo[a,l]pyrene (DB[a,l]P); fluoranthene (Fln); fluorene (Flu); indeno[1,2,3-cd]pyrene (InP); naphthalene (Naph); phenanthrene (Phe); polycyclic aromatic hydrocarbon (PAH) and pyrene (Pyr).

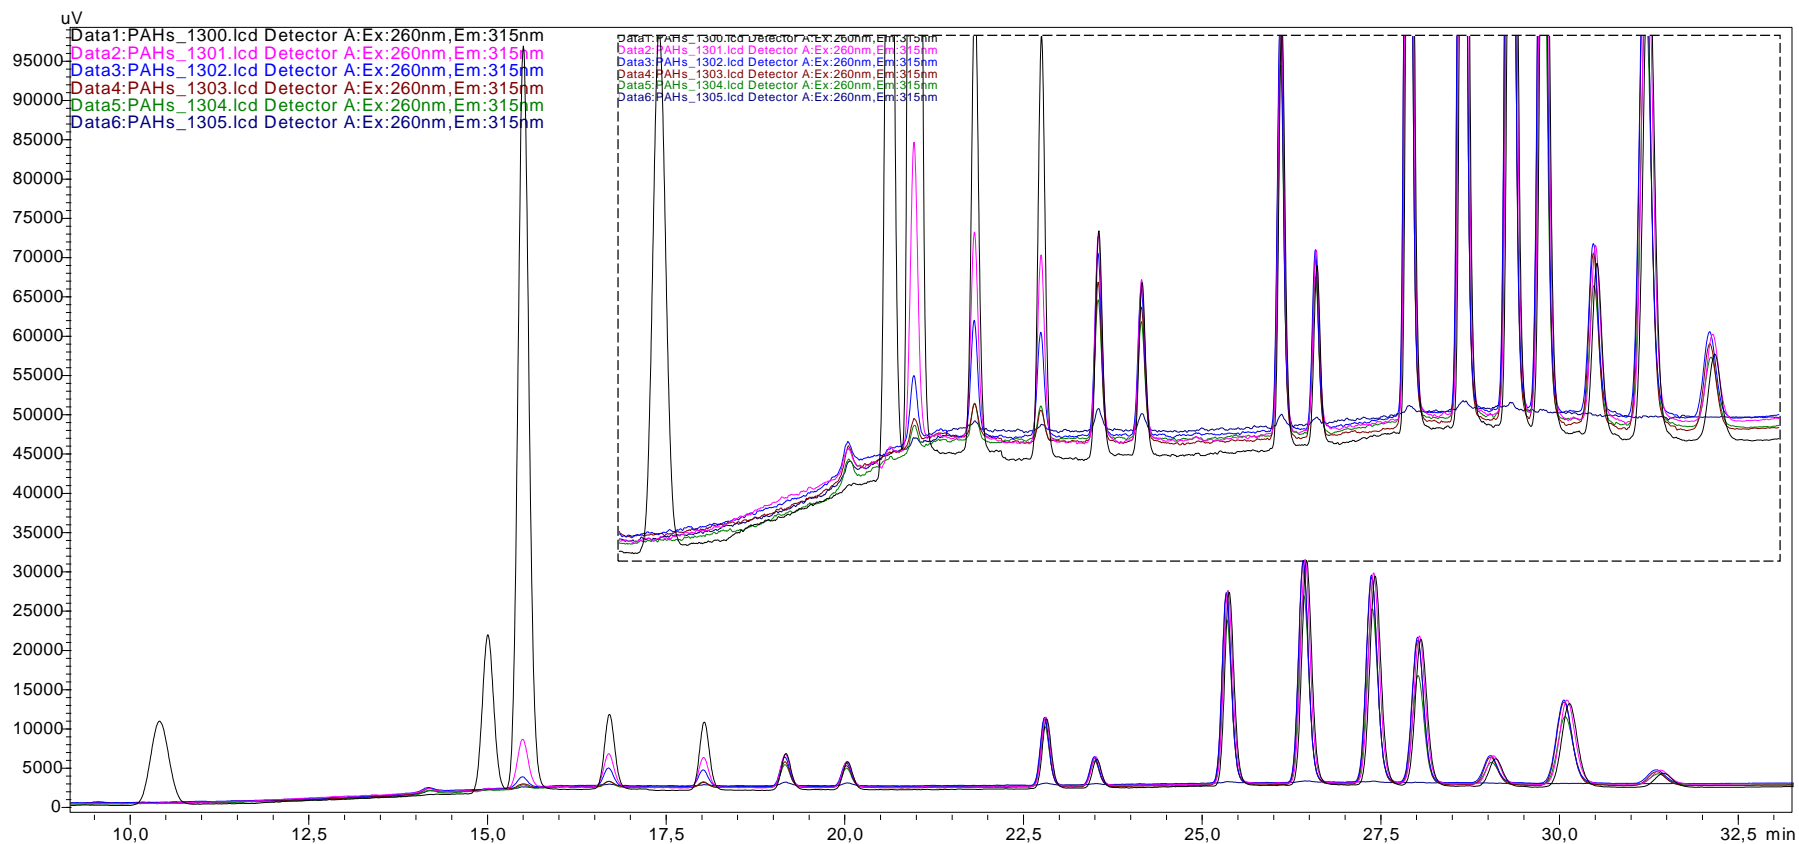

Figure SM4– Overlay of HPLC-FLD chromatograms of PAHs standard mixture after evaporation and redissolution in different solvents: S8 without being evaporated (black), S8 evaporated and redissolved in 100% ACN (pink), S8 evaporated and redissolved in 75% ACN/25% ultra-pure water (blue), S8 evaporated and redissolved in 50% ACN/50% ultra-pure water (brown), S8 evaporated and redissolved in 25% ACN/75% ultra-pure water (green) and S8 evaporated and redissolved in 100% ultra-pure water (dark blue). Note: Enlarged chromatogram area in dashed squares.

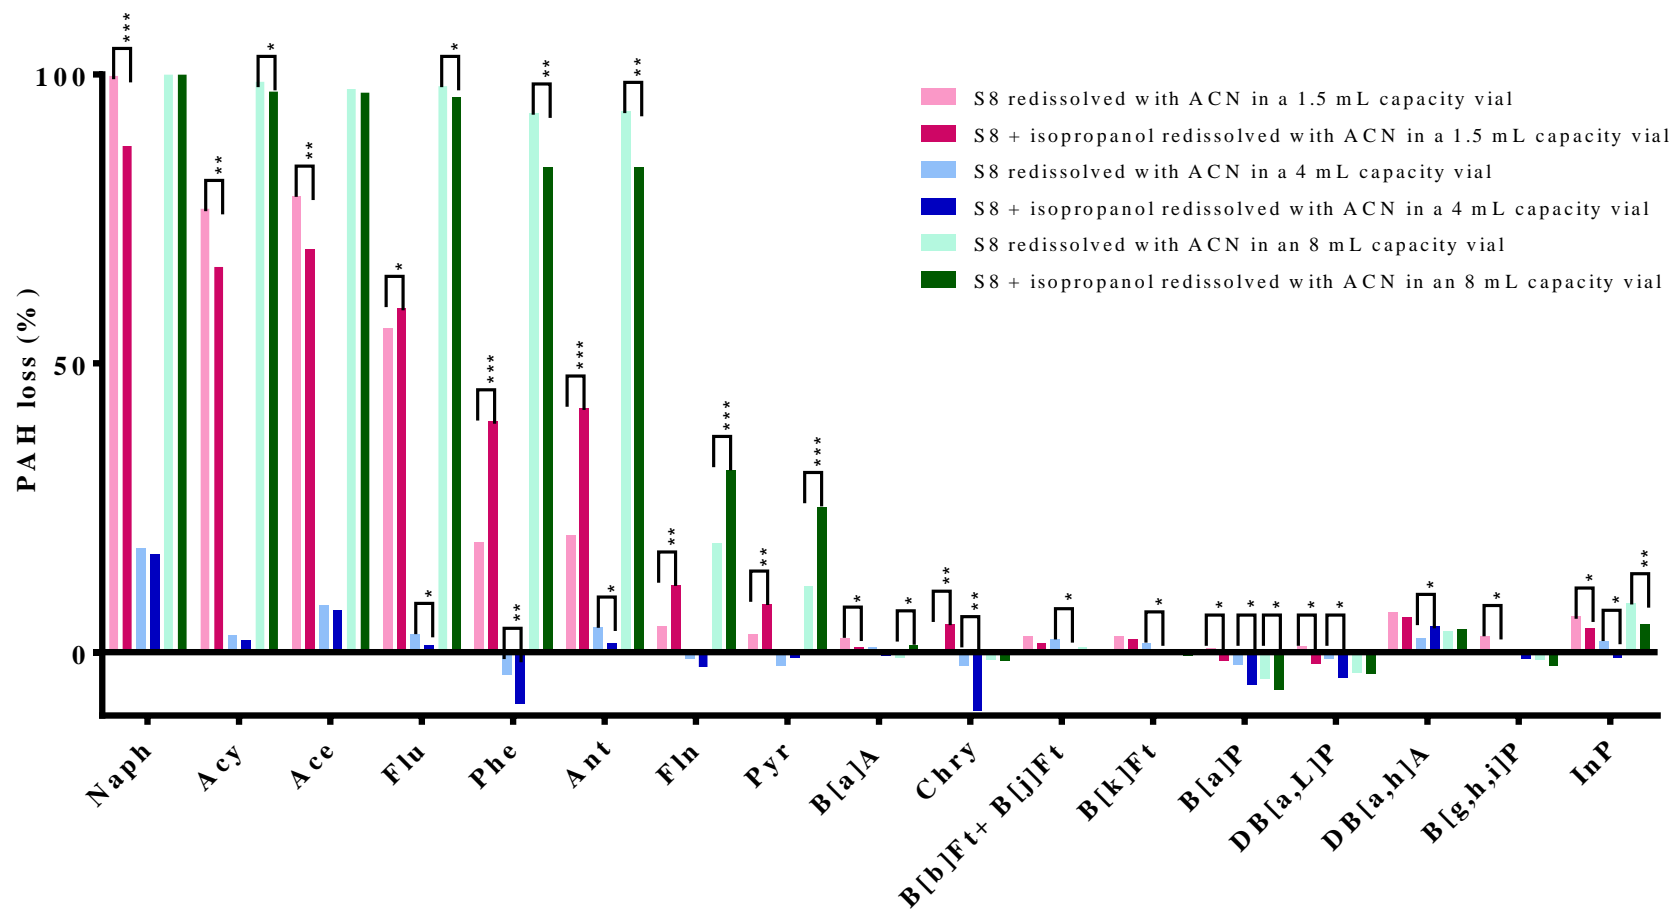

Figure SM5– Loss of PAHs (%) during evaporation in different capacity vials with and without the use of a keeper. Standard error of mean (SEM). Statistical significance was evaluated by Students t-test. Significantly difference between vials with and without the use of a keeper, \* $p < 0.05$ , \*\* $p < 0.01$ , \*\*\* $p < 0.001$ . Legend: Acenaphthene (Ace); acenaphthylene (Acy); acetonitrile (ACN); anthracene (Ant); benz[a]anthracene (B[a]A); benzo[a]pyrene (B[a]P); benzo[b]fluoranthene (B[b]Ft); benzo[g,h,i]perylene (B[g,h,i]P); benzo[j]fluoranthene (B[j]Ft); benzo[k]fluoranthene (B[k]Ft); chrysene (Chry); dibenz[a,h]anthracene (DB[a,h]A); dibenzo[a,l]pyrene (DB[a,l]P); fluoranthene (Fln); fluorene (Flu); indeno[1,2,3-cd]pyrene (InP); naphthalene (Naph); phenanthrene (Phe); polycyclic aromatic hydrocarbon (PAH) and pyrene (Pyr).

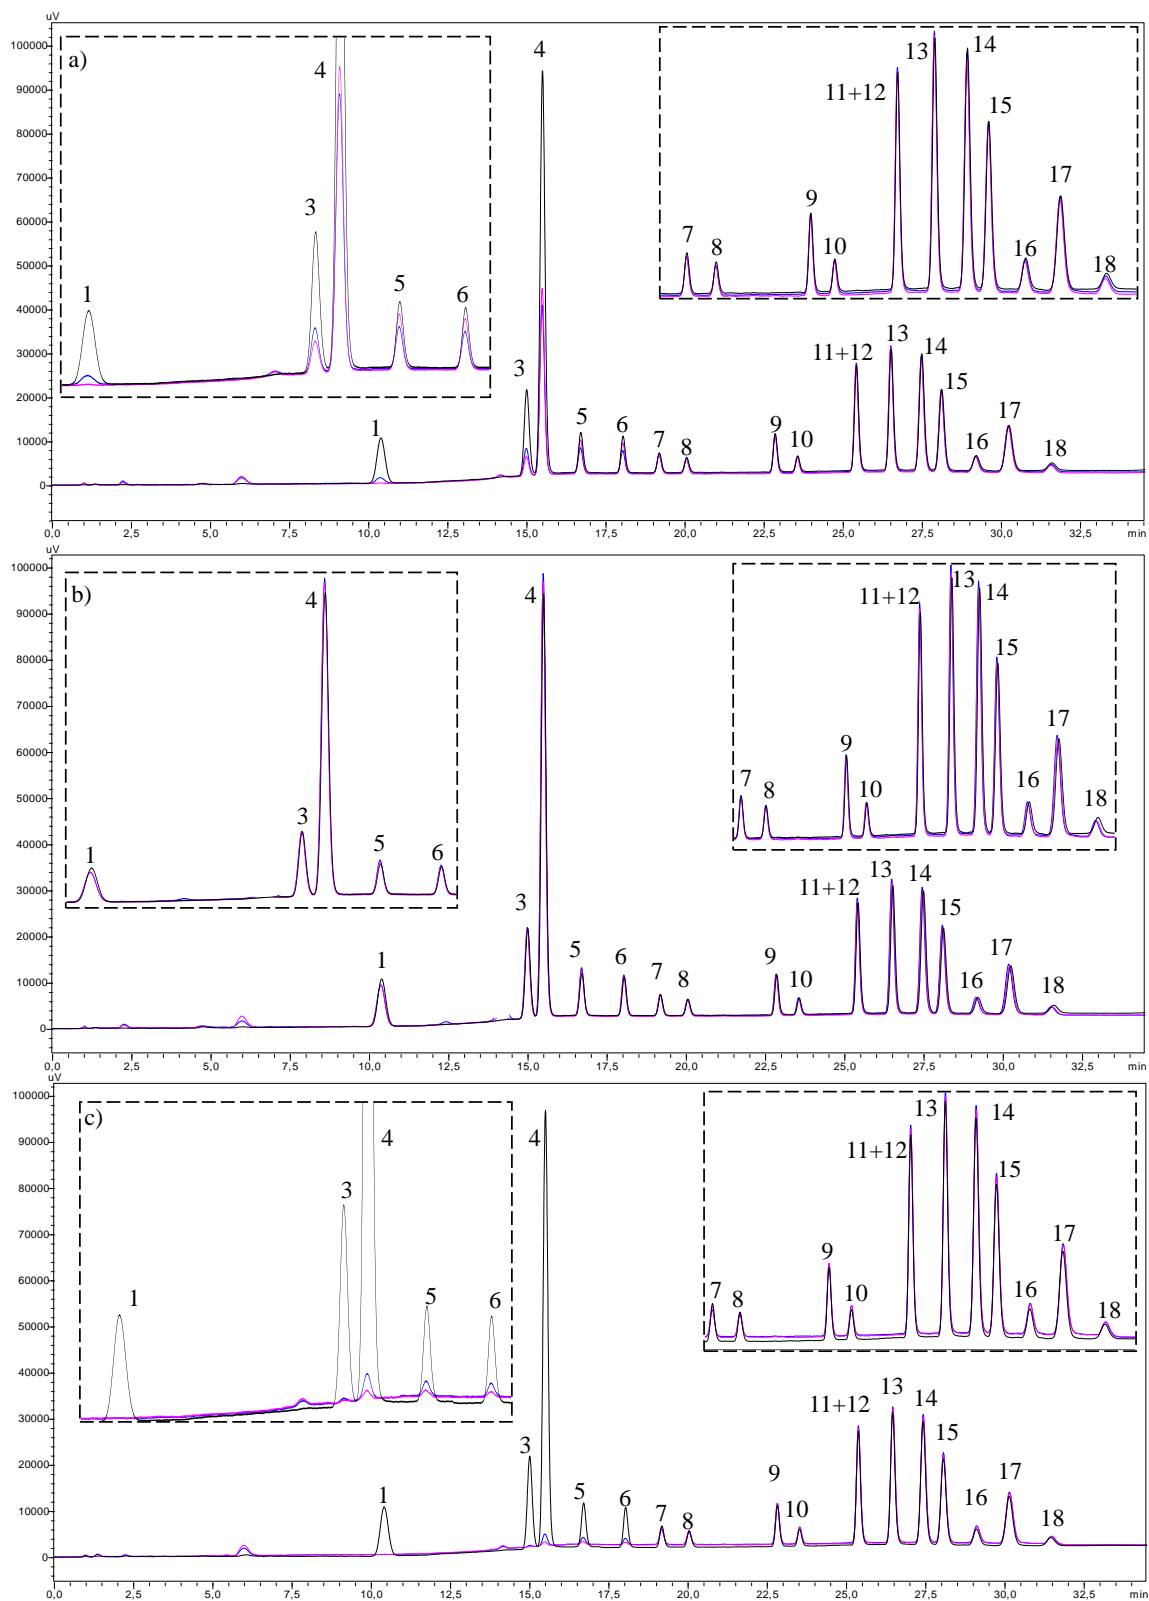

Figure SM6 – Overlay of HPLC-FLD chromatograms of PAHs standard mixture S8 in three different conditions: S8 without being evaporated (black), S8 evaporated (pink), or isopropanol and S8 evaporated (blue) in a) 1.5 mL capacity vial, b) 4 mL capacity vial, or c) 8 mL capacity vial.

Note: Enlarged chromatogram area in dashed squares. Legend: 1-naphthalene (Naph); 3-acenaphthene (Ace); 4-fluorene (Flu); 5-phenanthrene (Phe); 6-anthracene (Ant); 7-fluoranthene (Fln); 8-pyrene (Pyr); 9-benz[a]anthracene (B[a]A); 10-chrysene (Chry); 11+12-benzo[b]fluoranthene (B[b]Ft) + benzo[j]fluoranthene (B[j]Ft); 13-benzo[k]fluoranthene (B[k]Ft); 14-benzo[a]pyrene (B[a]P); 15-dibenzo[a,l]pyrene (DB[a,l]P); 16-dibenz[a,h]anthracene (DB[a,h]A); 17-benzo[g,h,i]perylene (B[g,h,i]P); and 18-indeno[1,2,3-cd]pyrene (InP).



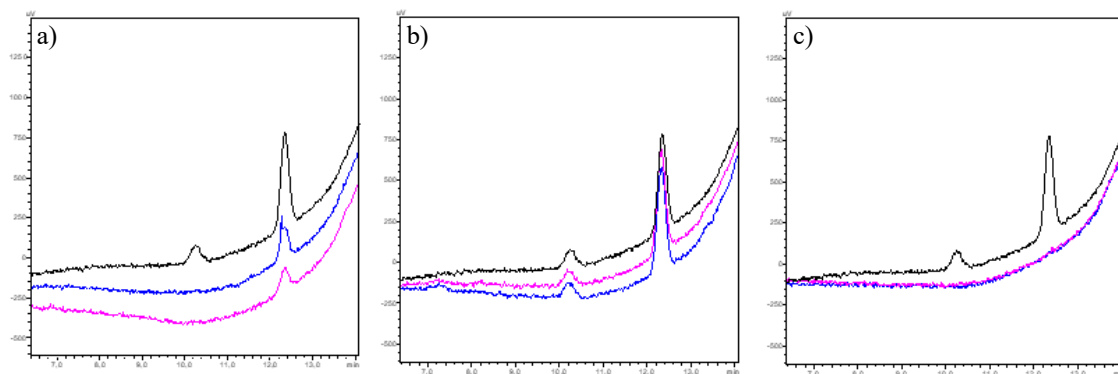

Figure SM7 –Overlay of HPLC-PDA chromatograms of acenaphthylene (Acy) standard S8 in three different conditions: S8 without being evaporated (black), S8 evaporated (pink), or isopropanol and S8 evaporated (blue) in a) 1.5 mL capacity vial, b) 4 mL capacity vial, and c) 8 mL capacity vial.

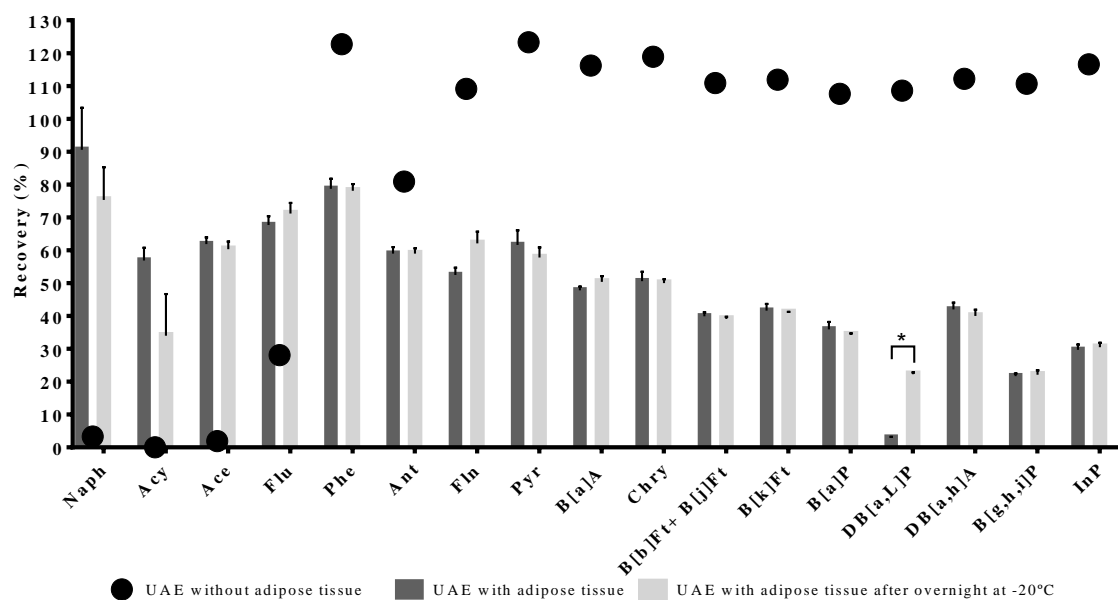

Figure SM8 – Effect on PAHs recoveries (% ± SEM) of sample preparation and heat in UAE. Standard error of mean (SEM). Statistical significance was evaluated by Students t-test. Significantly difference between UAE with adipose tissue, \* $p < 0.05$ .

Table SM3- PAHs (%) recoveries after fatty sample clean-up with additionally C18 and Z-Sep.

| <b>PAHs</b>     | <b>Recovery (%)</b> |
|-----------------|---------------------|
| Naph            | 16.3                |
| Acy             | 0.0                 |
| Ace             | 66.3                |
| Flu             | 84.9                |
| Phe             | 53.1                |
| Ant             | 81.8                |
| Fln             | 14.1                |
| Pyr             | 2.9                 |
| B[a]A           | 103.4               |
| Chry            | 68.9                |
| B[b]Ft + B[j]Ft | 73.8                |
| B[k]Ft          | 81.3                |
| B[a]P           | 70.8                |
| DB[a,l]P        | 78.5                |
| DB[a,h]A        | 57.0                |
| B[g,h,i]P       | 63.6                |
| InP             | 59.5                |

acenaphthene (Ace); acenaphthylene (Acy); anthracene (Ant); benz[a]anthracene (B[a]A); benzo[a]pyrene (B[a]P); benzo[b]fluoranthene (B[b]Ft); benzo[g,h,i]perylene (B[g,h,i]P); benzo[j]fluoranthene (B[j]Ft); benzo[k]fluoranthene (B[k]Ft); chrysene (Chry); dibenz[a,h]anthracene (DB[a,h]A); dibenzo[a,l]pyrene (DB[a,l]P); fluoranthene (Fln); fluorene (Flu); indeno[1,2,3-cd]pyrene (InP); naphthalene (Naph); phenanthrene (Phe); polycyclic aromatic hydrocarbon (PAH) and pyrene (Pyr).

Table SM4 – PAHs (%) recoveries with different amounts of adipose tissue extract.

| PAHs            | Amount of adipose tissue extract (mL)       |       |        |
|-----------------|---------------------------------------------|-------|--------|
|                 | 3.5                                         | 2.0   | 0.2    |
|                 | Amount of fat in adipose tissue extract (g) |       |        |
|                 | 0.006                                       | 0.004 | 0.0005 |
| Recovery (%)    |                                             |       |        |
| Naph            | 110.7                                       | 80.1  | 52.0   |
| Acy             | 46.4                                        | 60.0  | 72.2   |
| Ace             | 58.8                                        | 64.7  | 74.3   |
| Flu             | 69.6                                        | 73.2  | 79.6   |
| Phe             | 80.0                                        | 73.4  | 81.4   |
| Ant             | 62.6                                        | 67.0  | 77.8   |
| Fln             | 56.2                                        | 64.6  | 74.6   |
| Pyr             | 62.9                                        | 65.5  | 70.7   |
| B[a]A           | 39.9                                        | 60.4  | 72.0   |
| Chry            | 44.1                                        | 63.6  | 71.5   |
| B[b]Ft + B[j]Ft | 46.7                                        | 52.7  | 63.4   |
| B[k]Ft          | 46.6                                        | 52.6  | 63.4   |
| B[a]P           | 34.4                                        | 46.3  | 57.4   |
| DB[a,l]P        | 25.9                                        | 36.8  | 44.5   |
| DB[a,h]A        | 37.3                                        | 60.4  | 61.4   |
| B[g,h,i]P       | 26.1                                        | 37.1  | 47.6   |
| InP             | 33.6                                        | 39.8  | 52.1   |
| <b>Average</b>  | 51.9                                        | 58.7  | 65.6   |

acenaphthene (Ace); acenaphthylene (Acy); anthracene (Ant); benz[a]anthracene (B[a]A); benzo[a]pyrene (B[a]P); benzo[b]fluoranthene (B[b]Ft); benzo[g,h,i]perylene (B[g,h,i]P); benzo[j]fluoranthene (B[j]Ft); benzo[k]fluoranthene (B[k]Ft); chrysene (Chry); dibenz[a,h]anthracene (DB[a,h]A); dibenzo[a,l]pyrene (DB[a,l]P); fluoranthene (Fln); fluorene (Flu); indeno[1,2,3-cd]pyrene (InP); naphthalene (Naph); phenanthrene (Phe); polycyclic aromatic hydrocarbon (PAH) and pyrene (Pyr).

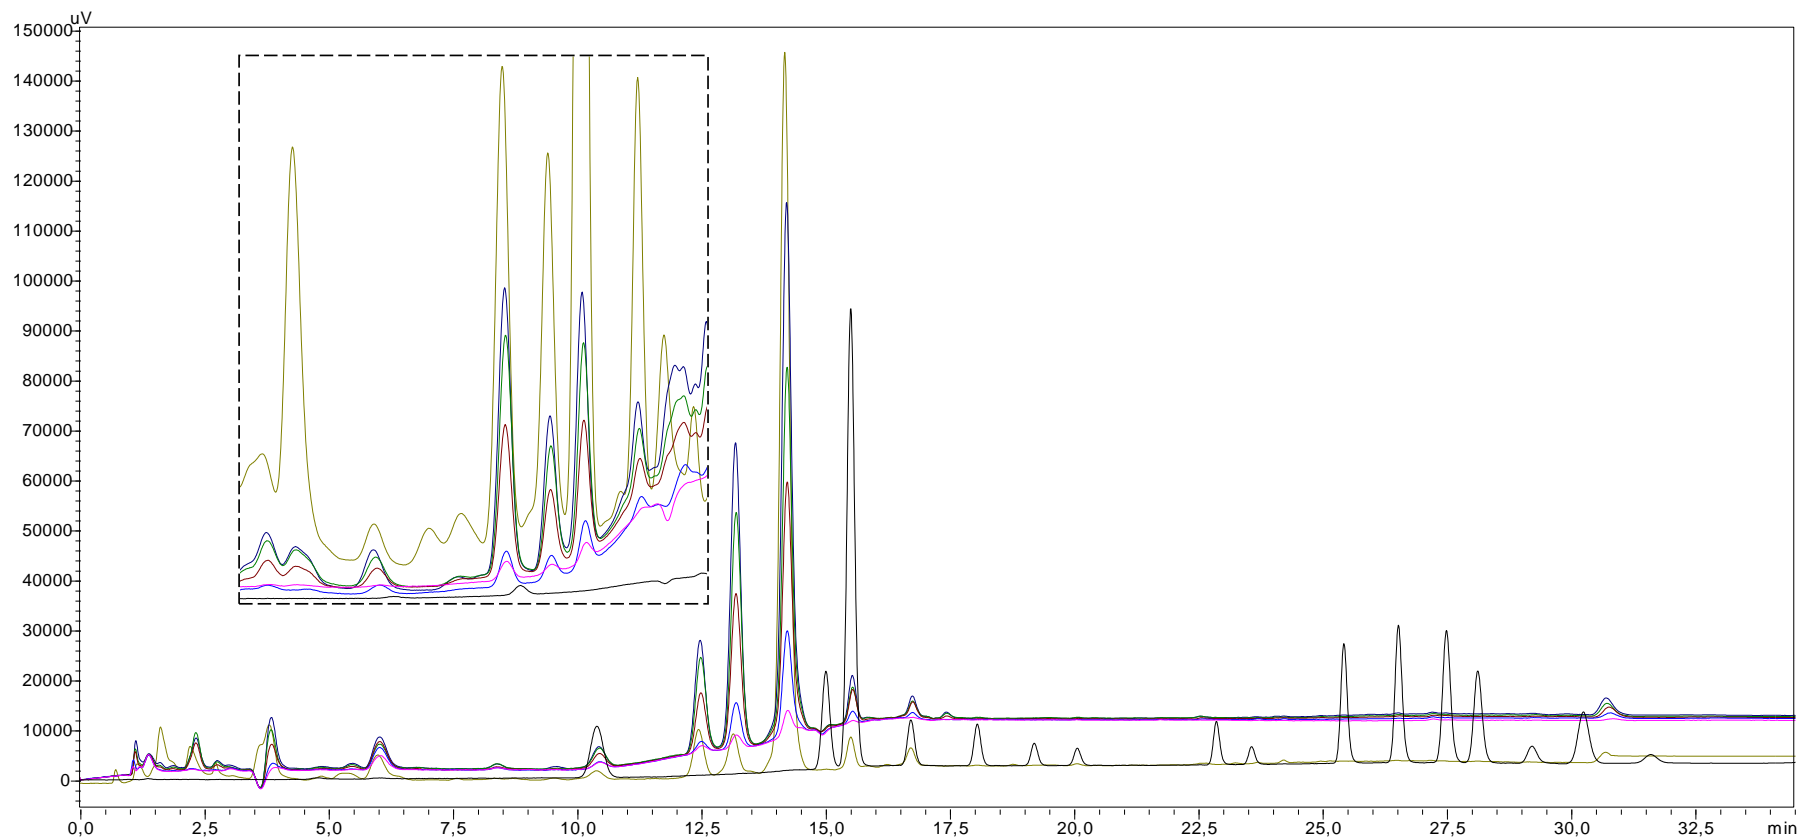

Figure SM9- Overlay of HPLC-FLD chromatograms of PAHs standard mixture S8 in three different conditions and adipose tissue extracts with different concentration factors (CF): S8 standard (black), CF=1 (pink), CF = 5 (blue), CF = 10 (brown), CF =15 (green), CF= 20 (dark blue) and CF = 25 (light green). Note: Enlarged chromatogram area in dashed squares.

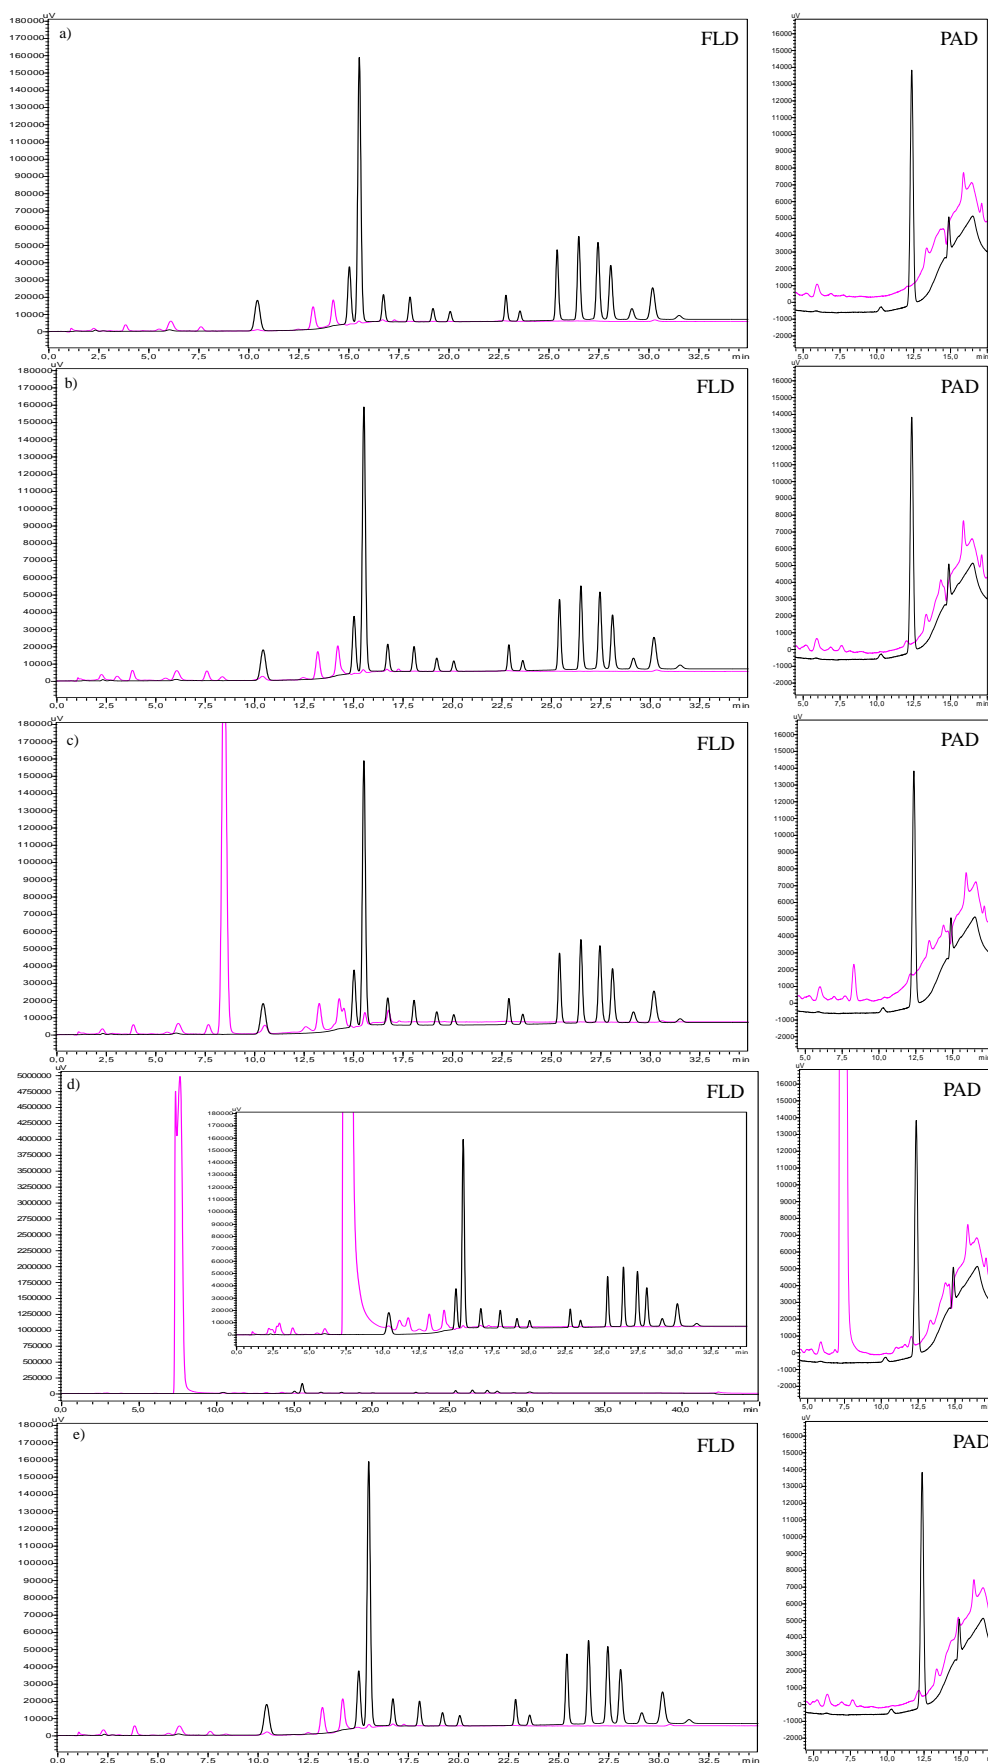

Figure SM10 – Overlay HPLC-FLD and HPLC-PDA chromatograms of PAHs standard mixture S8 (black) and adipose tissue extracts (pink) in different exchange solvents: a) ACN, b) ethyl acetate, c) acetone, d) toluene, and e) DCM.

Table SM5 – Signal suppression or enhancement (%) for PAHs with different exchange solvents.

| Signal suppression/ enhancement (%) |                  |               |         |         |       |                                 |                           |                           |                       |                                 |
|-------------------------------------|------------------|---------------|---------|---------|-------|---------------------------------|---------------------------|---------------------------|-----------------------|---------------------------------|
| PAHs                                | Solvent exchange |               |         |         |       |                                 |                           |                           |                       |                                 |
|                                     | ACN              | Ethyl acetate | Acetone | Toluene | DCM   | ACN/Ethyl Acetate (50:50%, v/v) | ACN/Acetone (50:50%, v/v) | ACN/Toluene (50:50%, v/v) | ACN/DCM (50:50%, v/v) | ACN/Ethyl Acetate (25:75%, v/v) |
| Naph                                | 2.2              | -36.9         | -34.6   | -35.7   | -34.6 | -22.6                           | -7.8                      | -37.8                     | -36.0                 | -35.6                           |
| Acy                                 | -0.1             | -23.3         | -17.7   | -16.7   | -13.4 | -13.8                           | -12.3                     | -30.8                     | -18.9                 | -12.9                           |
| Ace                                 | 111.5            | 56.2          | 62.5    | 50.9    | 71.4  | 80.2                            | 102.4                     | 54.5                      | 62.7                  | -27.2                           |
| Flu                                 | -58.6            | -67.6         | -66.9   | -71.2   | -70.1 | -62.9                           | -60.5                     | -70.9                     | -64.5                 | -27.0                           |
| Phe                                 | -4.6             | -25.4         | -26.0   | -29.3   | -24.2 | -15.2                           | -10.9                     | -26.4                     | -23.8                 | -20.6                           |
| Ant                                 | -6.3             | -32.3         | -31.9   | -32.0   | -29.1 | -18.8                           | -11.6                     | -31.1                     | -31.5                 | -23.9                           |
| Fln                                 | -0.7             | -27.0         | -23.9   | -26.6   | -24.8 | -14.5                           | -6.0                      | -27.1                     | -26.0                 | -22.9                           |
| Pyr                                 | -0.3             | -30.5         | -28.5   | -30.1   | -30.5 | -18.3                           | -6.8                      | -31.1                     | -29.3                 | -26.3                           |
| B[a]A                               | 1.3              | -33.4         | -28.2   | -33.6   | -33.3 | -20.4                           | -4.9                      | -35.1                     | -34.7                 | -30.3                           |
| Chry                                | -2.3             | -36.8         | -34.5   | -35.4   | -36.1 | -23.0                           | -9.3                      | -37.1                     | -36.9                 | -33.3                           |
| B[b]Ft + B[j]Ft                     | -0.2             | -36.6         | -35.6   | -35.1   | -36.1 | -21.0                           | -7.9                      | -36.0                     | -36.5                 | -33.3                           |
| B[k]Ft                              | -0.1             | -45.0         | -42.4   | -42.1   | -43.2 | -28.6                           | -10.6                     | -44.2                     | -44.2                 | -41.5                           |
| B[a]P                               | 0.0              | -45.0         | -42.3   | -41.9   | -43.4 | -28.3                           | -10.2                     | -44.0                     | -44.4                 | -41.2                           |
| DB[a,l]P                            | 0.7              | -50.7         | -48.5   | -47.3   | -49.0 | -33.1                           | -12.2                     | -49.8                     | -49.9                 | -46.3                           |
| DB[a,h]A                            | 1.9              | -62.6         | -62.1   | -58.3   | -62.6 | -47.3                           | -19.5                     | -63.1                     | -63.4                 | -62.3                           |
| B[g,h,i]P                           | 0.8              | -47.7         | -46.0   | -43.0   | -45.4 | -29.9                           | -9.8                      | -47.0                     | -47.2                 | -44.4                           |
| InP                                 | -0.2             | -62.2         | -59.7   | -57.4   | -61.1 | -44.3                           | -18.3                     | -60.8                     | -62.0                 | -58.2                           |

acenaphthene (Ace); acenaphthylene (Acy); acetonitrile (ACN); anthracene (Ant); benz[a]anthracene (B[a]A); benzo[a]pyrene (B[a]P); benzo[b]fluoranthene (B[b]Ft); benzo[g,h,i]perylene (B[g,h,i]P); benzo[j]fluoranthene (B[j]Ft); benzo[k]fluoranthene (B[k]Ft); chrysene (Chry); DCM – dichloromethane; dibenz[a,h]anthracene (DB[a,h]A); dibenzo[a,l]pyrene (DB[a,l]P); fluoranthene (Fln); fluorene (Flu); indeno[1,2,3-cd]pyrene (InP); naphthalene (Naph); phenanthrene (Phe); polycyclic aromatic hydrocarbon (PAH) and pyrene (Pyr).

Table SM6. Methods eco-scale score for the presented study and other existent studies for PAHs determination in adipose tissue.

| Description/Reference                   | Penalty Points                        |                                       |             |             |            |             |              |              |                |
|-----------------------------------------|---------------------------------------|---------------------------------------|-------------|-------------|------------|-------------|--------------|--------------|----------------|
|                                         | Present study (Method 1) <sup>1</sup> | Present study (Method 2) <sup>2</sup> | 21          | 22,23       | 24         | 25,26       | 27           | 28,29        | 30             |
| ACN                                     | 2 (1.14 mL)                           | 2 (0.14 mL)                           | 2 (3.5 mL)  | -           | 4 (70 mL)  | -           | -            | -            | -              |
| Alumina                                 | -                                     | -                                     | -           | -           | -          | -           | -            | -            | 0 (6g)         |
| Analytes standard solution              | 4                                     | 4                                     | 4           | 4           | 4          | 4           | 4            | 4            | 4              |
| Bio-Beads S-X3 (styrene divinylbenzene) | -                                     | -                                     | -           | 0           | 0          | -           | -            | 0 (60g)      | -              |
| CCl <sub>4</sub>                        | -                                     | -                                     | 8 (50 µL)   | -           | -          | -           | -            | -            | -              |
| DCM                                     | -                                     | -                                     | -           | 3 (425 mL)  | -          | -           | -            | -            | -              |
| Diethyl ether                           | -                                     | -                                     | -           | -           | -          | -           | -            | 12 (162 mL)  | 8              |
| Dimethylsulfoxide                       | -                                     | -                                     | -           | -           | -          | -           | -            | -            | 8              |
| Ethanol                                 | -                                     | -                                     | -           | -           | -          | -           | -            | -            | 4              |
| Ethyl Acetate                           | -                                     | 4 (1 mL)                              | -           | -           | 8 (12 mL)  | -           | -            | -            | -              |
| Florisol                                | -                                     | -                                     | -           | -           | -          | -           | -            | 0 (12.5 g)   | -              |
| <i>n</i> -Hexane                        | 8 (6 mL)                              | -                                     | -           | 24 (225 mL) | 16 (12 mL) | 16 (52 mL)  | 16 (24.5 mL) | 32 (1593 mL) | 32 (900 mL)    |
| KOH                                     | -                                     | -                                     | -           | -           | -          | -           | -            | -            | 4              |
| Methylene Chloride                      | -                                     | -                                     | -           | -           | -          | 24 (425 mL) | -            | 32 (1411 mL) | -              |
| Na <sub>2</sub> SO <sub>4</sub>         | -                                     | -                                     | -           | 0           | 0 (15 g)   | 0 (10 g)    | 0 (5-10 g)   | 0 (5-10 g)   | 0              |
| NaCl                                    | -                                     | -                                     | 0 (9 mL 5%) | -           | -          | -           | -            | -            | 0 (100 mL 15%) |
| <i>n</i> -nonane                        | -                                     | -                                     | -           | 6 (1 mL)    | -          | -           | -            | -            | -              |
| Silica gel                              | -                                     | -                                     | -           | 0 (0.5 g)   | -          | -           | -            | -            | 0 (5g)         |
| Water                                   | -                                     | -                                     | 0 (3 mL)    | -           | -          | -           | -            | -            | 0 (300 mL)     |

<sup>1</sup> Use of ACN as solvent exchange; <sup>2</sup> Method 2- Use of ACN/ethyl acetate (25:75%, v/v) as solvent exchange. Acetonitrile (ACN); dichloromethane (DCM) and polycyclic aromatic hydrocarbon (PAH).

Table SM6. Methods eco-scale score for the presented study and other existent studies for PAHs determination in adipose tissue (continuation).

| Description/Reference                   | Penalty Points                           |                                          |           |           |           |           |           |          |           |
|-----------------------------------------|------------------------------------------|------------------------------------------|-----------|-----------|-----------|-----------|-----------|----------|-----------|
|                                         | Present study<br>(Method 1) <sup>1</sup> | Present study<br>(Method 2) <sup>2</sup> | 21        | 22,23     | 24        | 25,26     | 27        | 28,29    | 30        |
| <b>Instruments</b>                      |                                          |                                          |           |           |           |           |           |          |           |
| Centrifuge                              | 0                                        | 0                                        | 0         | -         | 0         | -         | -         | -        | -         |
| GC-MS                                   | -                                        | 2                                        | 2         | 2         | 2         | 2         | -         | 2        | -         |
| GC-TOF MS                               | -                                        | -                                        | -         | -         | -         | -         | 2         | -        | -         |
| Heater                                  | -                                        | -                                        | -         | -         | -         | -         | 2         | -        | -         |
| Homogeniser                             | -                                        | -                                        | -         | -         | 0         | -         | -         | 0        | -         |
| Kuderna-Danish evaporator               | -                                        | -                                        | -         | -         | -         | 1         | -         | 1        | -         |
| LC-FLD                                  | -                                        | -                                        | -         | -         | -         | -         | -         | -        | 1         |
| LC-FLD-PDA                              | 1                                        | -                                        | -         | -         | -         | -         | -         | -        | -         |
| Needle evaporator                       | 0                                        | -                                        | -         | -         | -         | -         | 0         | 0        | -         |
| Rotary evaporator                       | -                                        | -                                        | -         | -         | 2         | -         | -         | -        | -         |
| Soxhlet                                 | -                                        | -                                        | 2         | -         | -         | 2         | -         | -        | -         |
| Ultrasonic processor                    | 0                                        | -                                        | -         | -         | -         | -         | -         | -        | -         |
| Vortex                                  | 0                                        | -                                        | -         | -         | -         | -         | 0         | -        | -         |
| <b>Others</b>                           |                                          |                                          |           |           |           |           |           |          |           |
| Occupational hazard                     | 3                                        | 3                                        | 3         | 3         | 3         | 0         | 6         | 3        | 3         |
| Waste                                   | 8                                        | 8                                        | 8         | 5         | 5         | 8         | 3         | 8        | 8         |
| Total penalty points                    | 26                                       | 30                                       | 27        | 49        | 44        | 57        | 33        | 94       | 72        |
| <b>Analytical Eco-Scale total score</b> | <b>74</b>                                | <b>70</b>                                | <b>73</b> | <b>51</b> | <b>56</b> | <b>43</b> | <b>67</b> | <b>6</b> | <b>28</b> |

<sup>1</sup> Use of ACN as solvent exchange; <sup>2</sup> Method 2- Use of ACN/ethyl acetate (25:75%, v/v) as solvent exchange. Gas chromatography (GC); fluorescence detector (FLD); liquid chromatography (LC); mass spectrometry (MS); photodiode array detector (PDA); polycyclic aromatic hydrocarbon (PAH); time – of- flight (TOF).
